# Supplementary material for: Highly Specific Sigma Receptor Ligands Exhibit Anti-Viral Properties in SARS-CoV-2 Infected Cells
Source: MDPI journal article supplement (doi:10.3390/pathogens10111514), 2021-11-20

LCMS traces of tested compounds with peak purity

LCMS method:

Solvent A: ACN (0.1 % FA); Solvent B: Water (0.1% FA);

| Time (min) | Flow (ml/min) | %A    | %B   |
|------------|---------------|-------|------|
| Initial    | 0.300         | 10.0  | 90.0 |
| 0.50       | 0.300         | 10.0  | 90.0 |
| 3.50       | 0.300         | 100.0 | 0.0  |
| 4.00       | 0.300         | 100.0 | 0.0  |
| 4.50       | 0.300         | 10.0  | 90.0 |
| 6.00       | 0.300         | 10.0  | 90.0 |

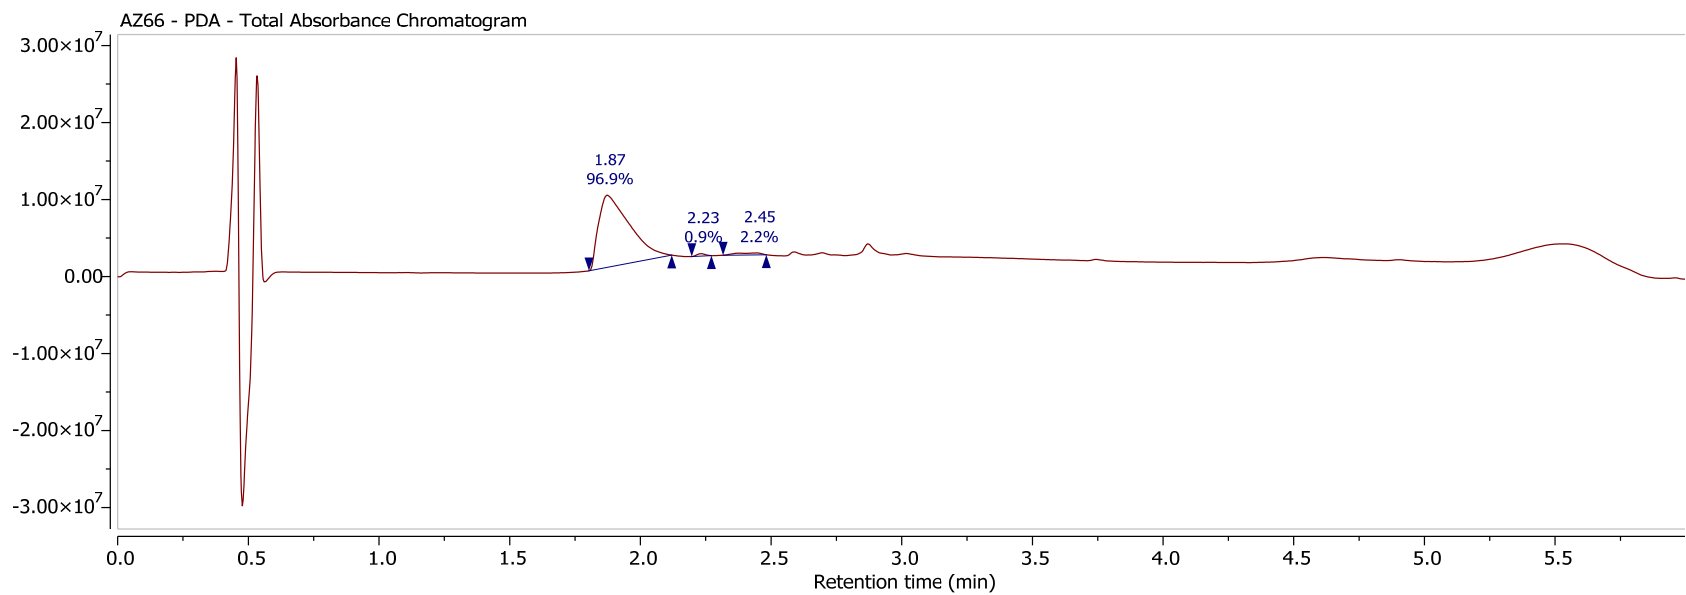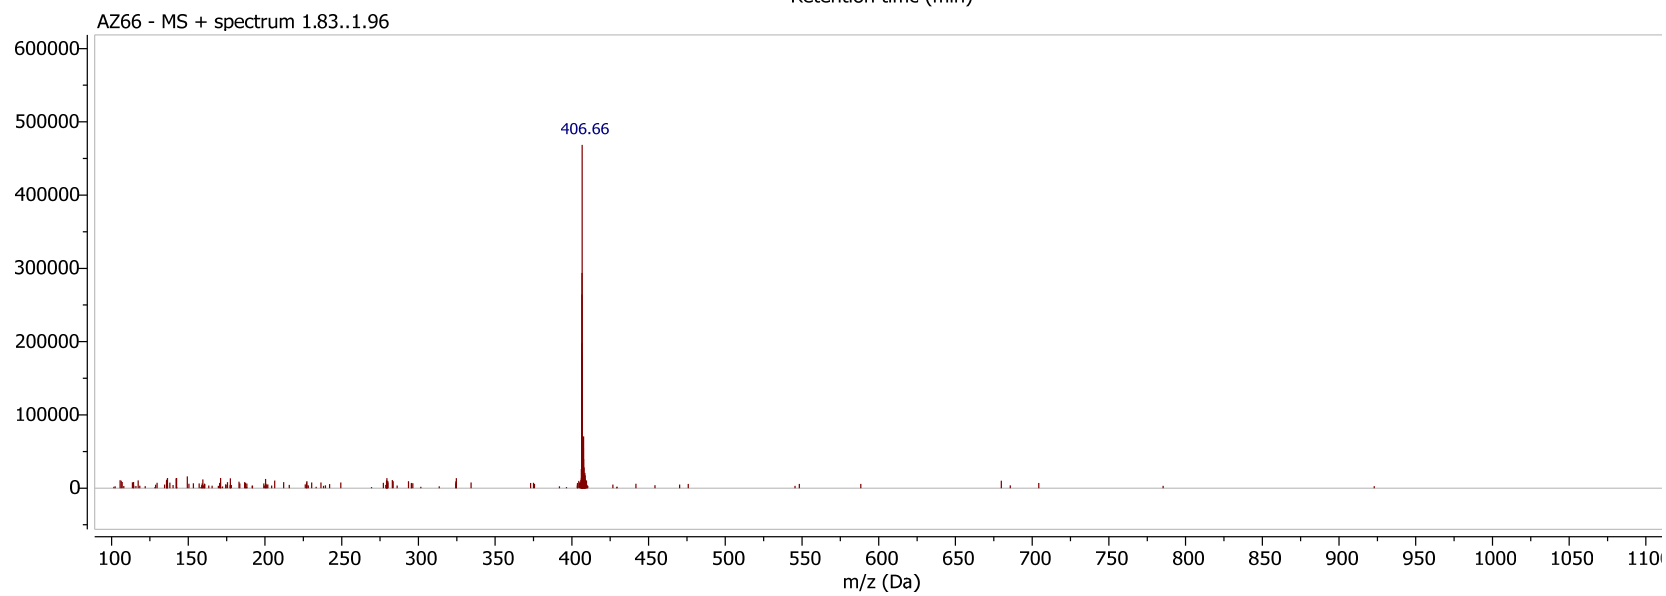

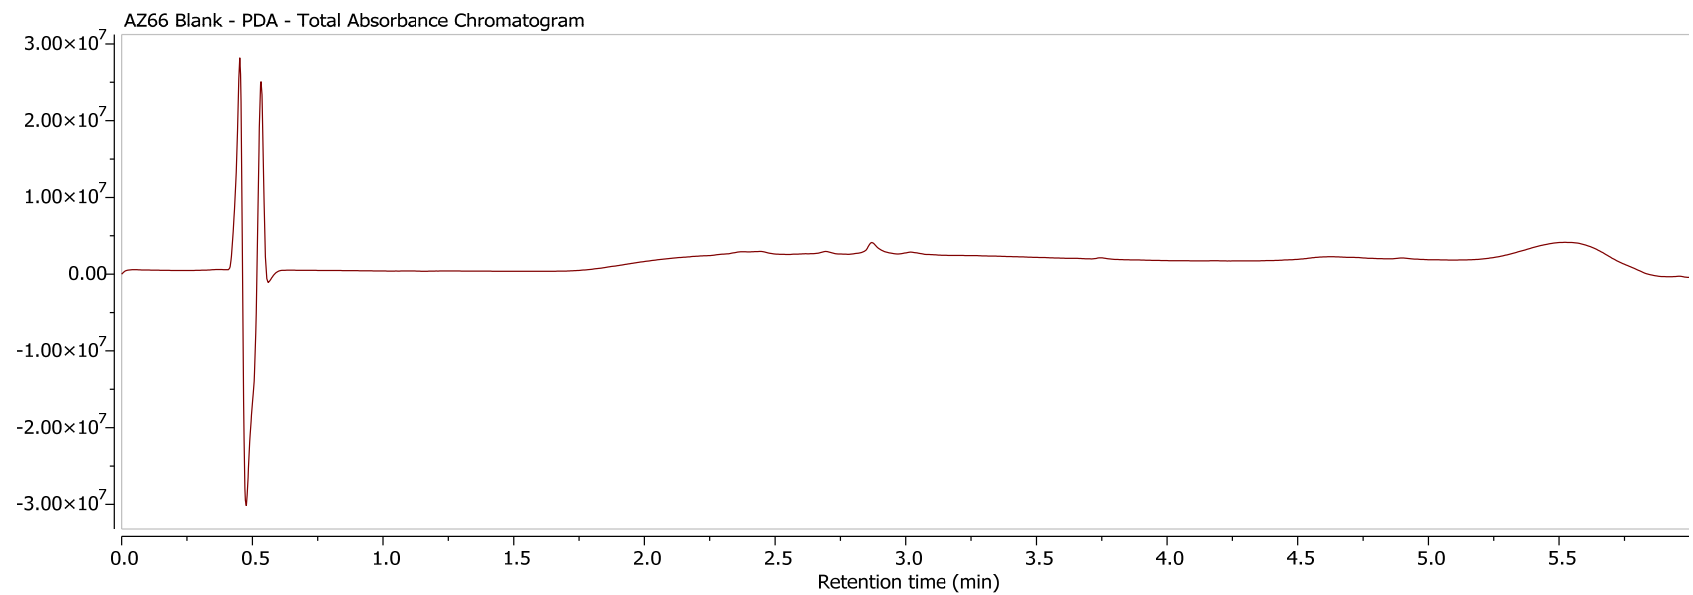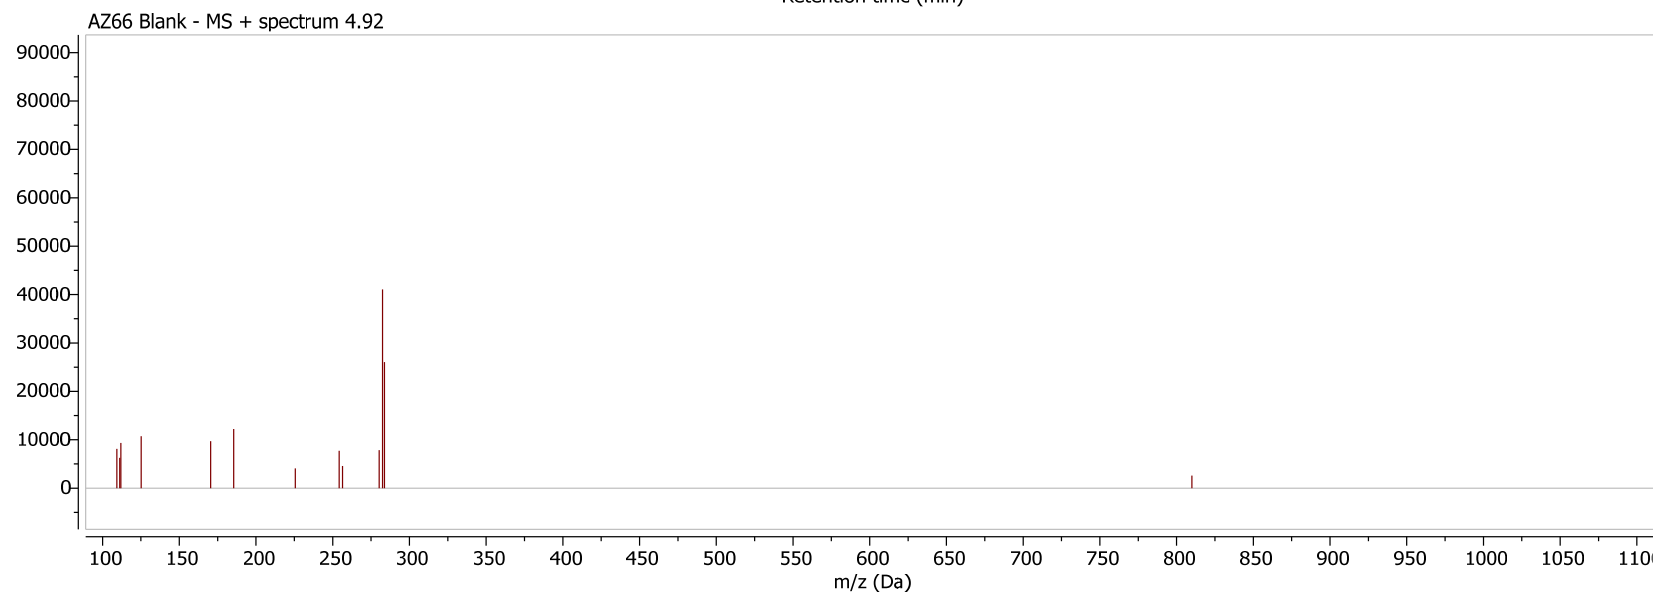

CM304 - PDA - Total Absorbance Chromatogram

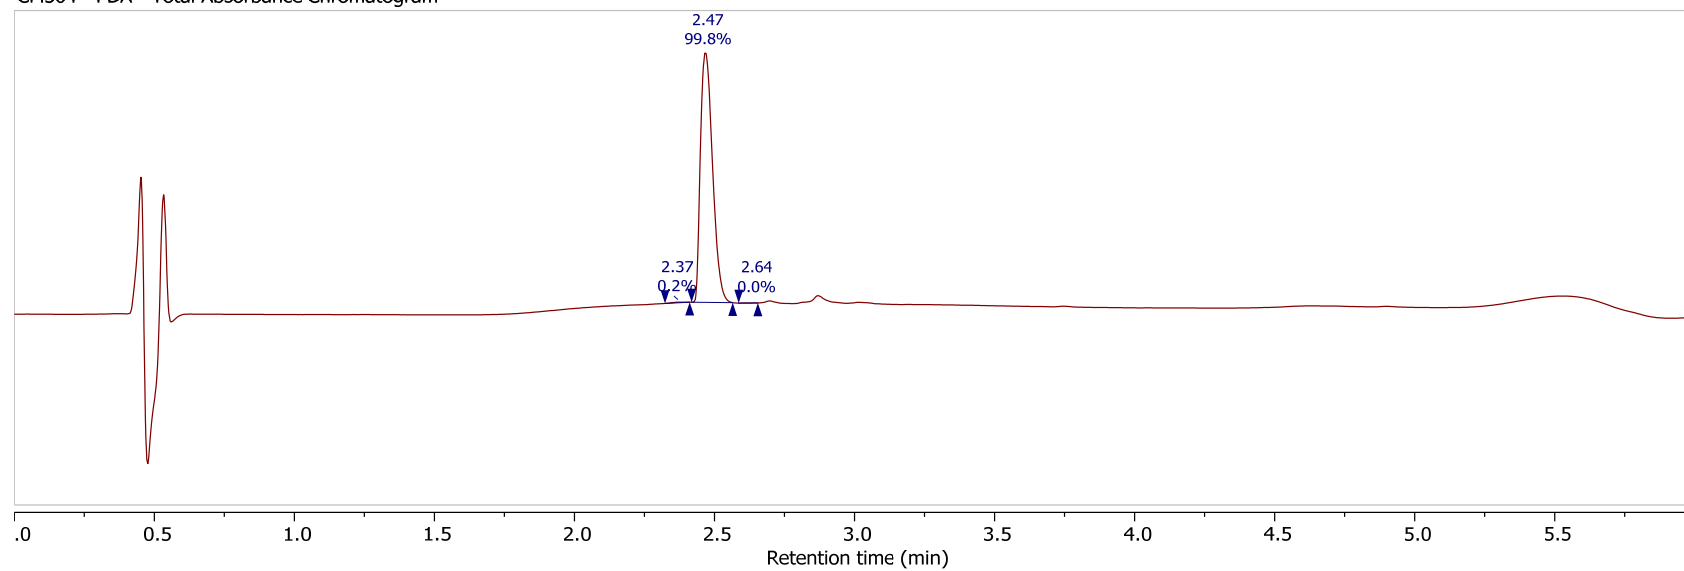

CM304 - MS + spectrum 2.45..2.49

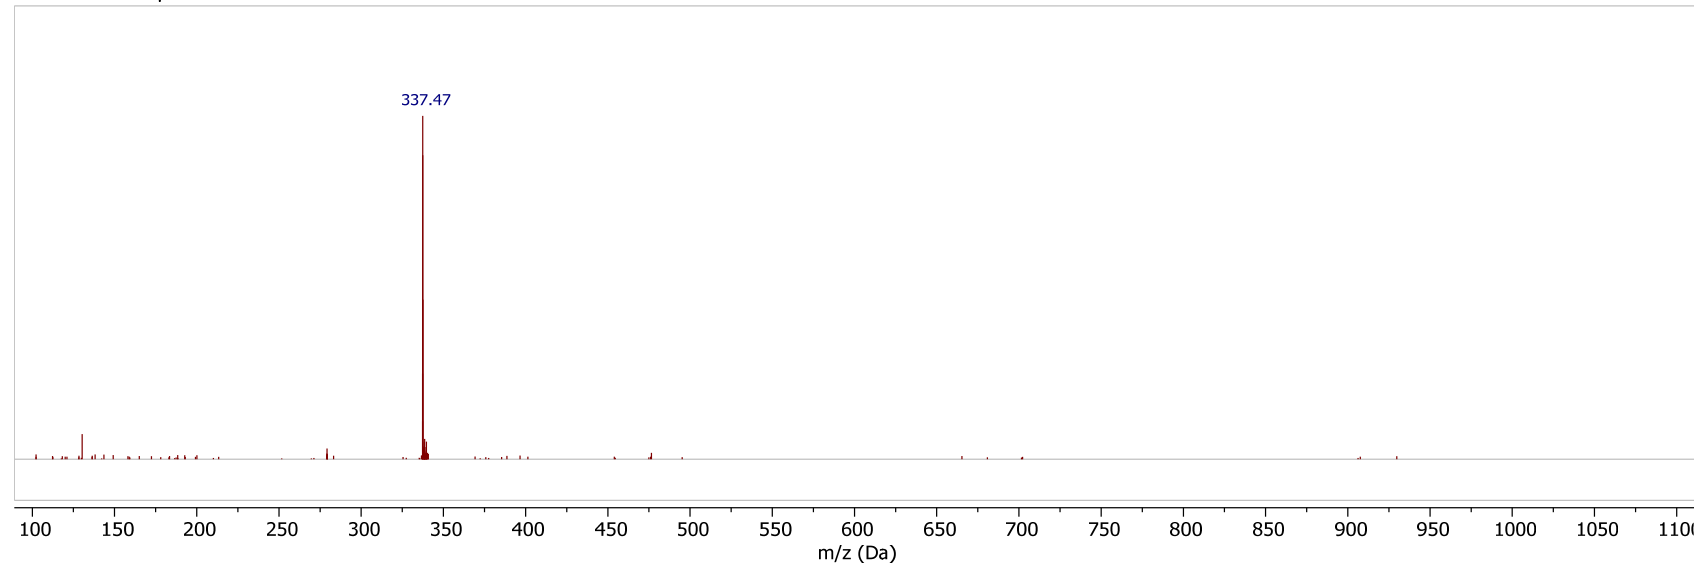

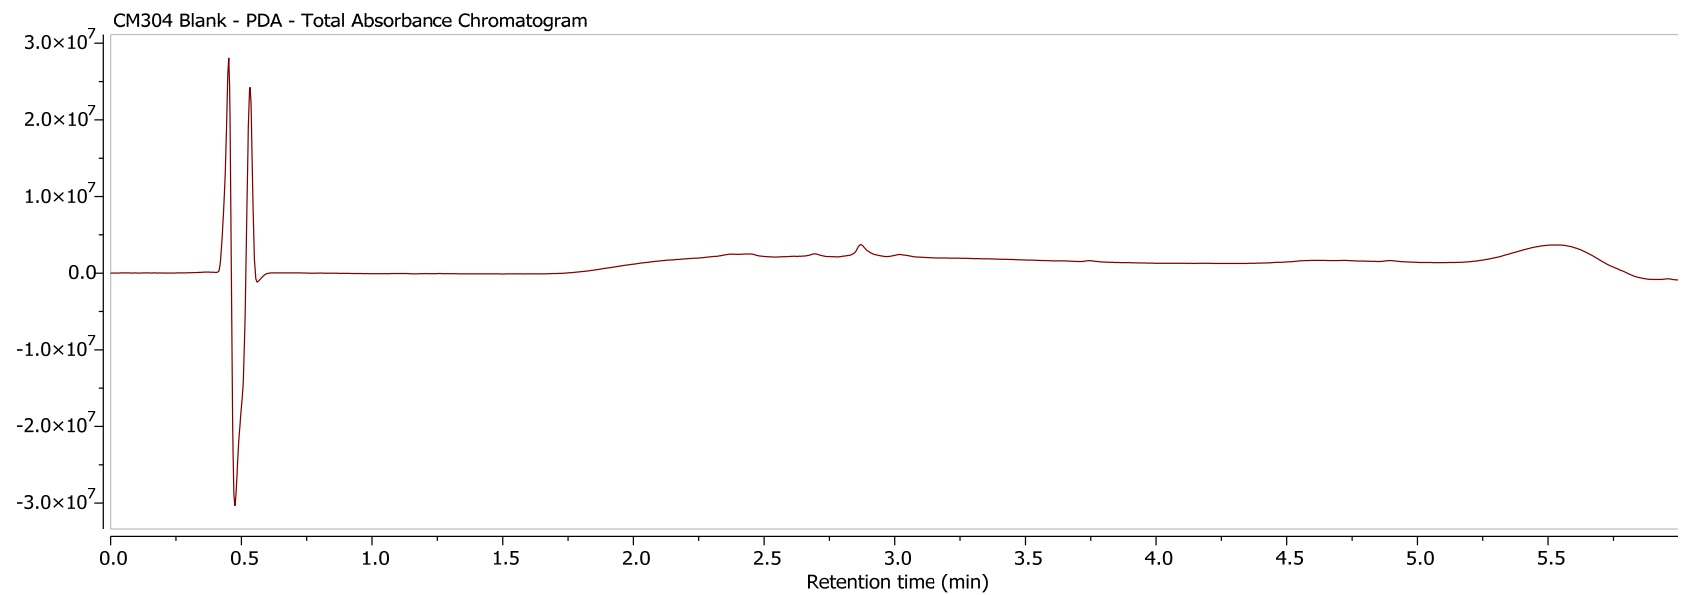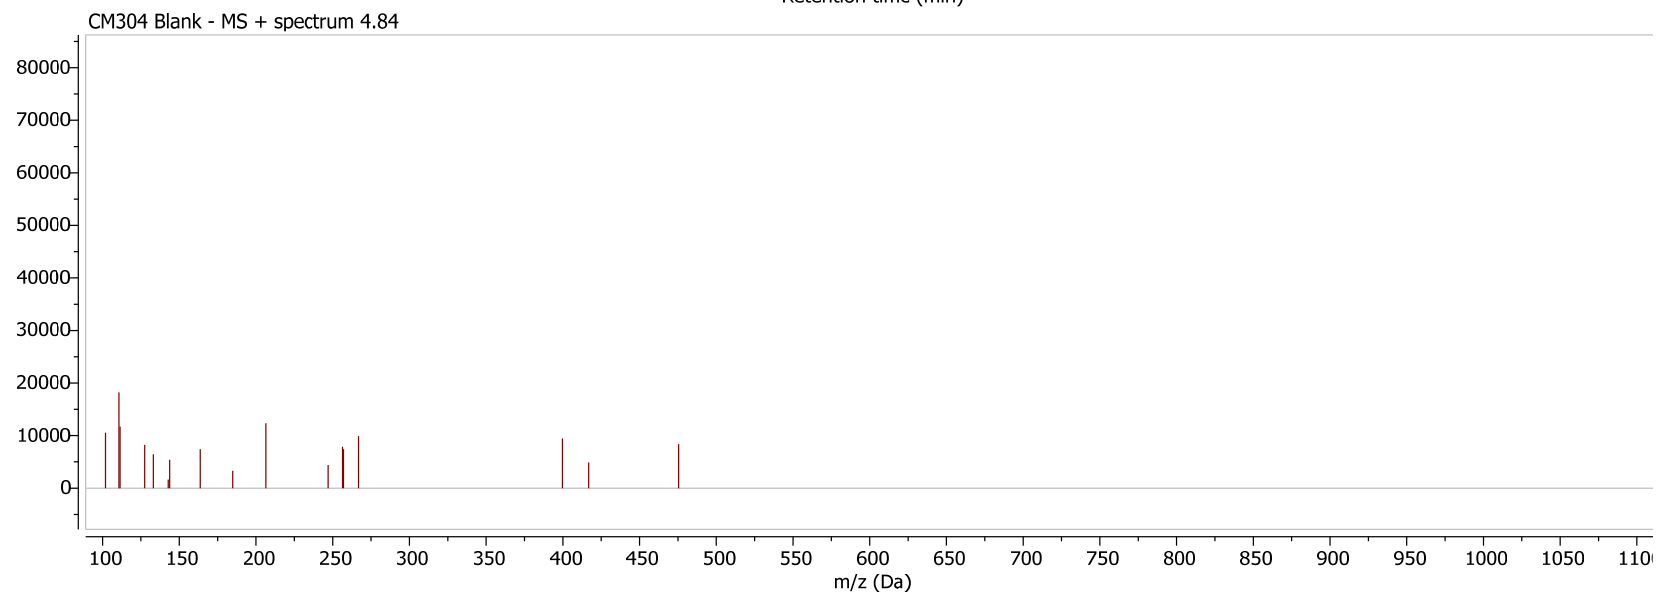

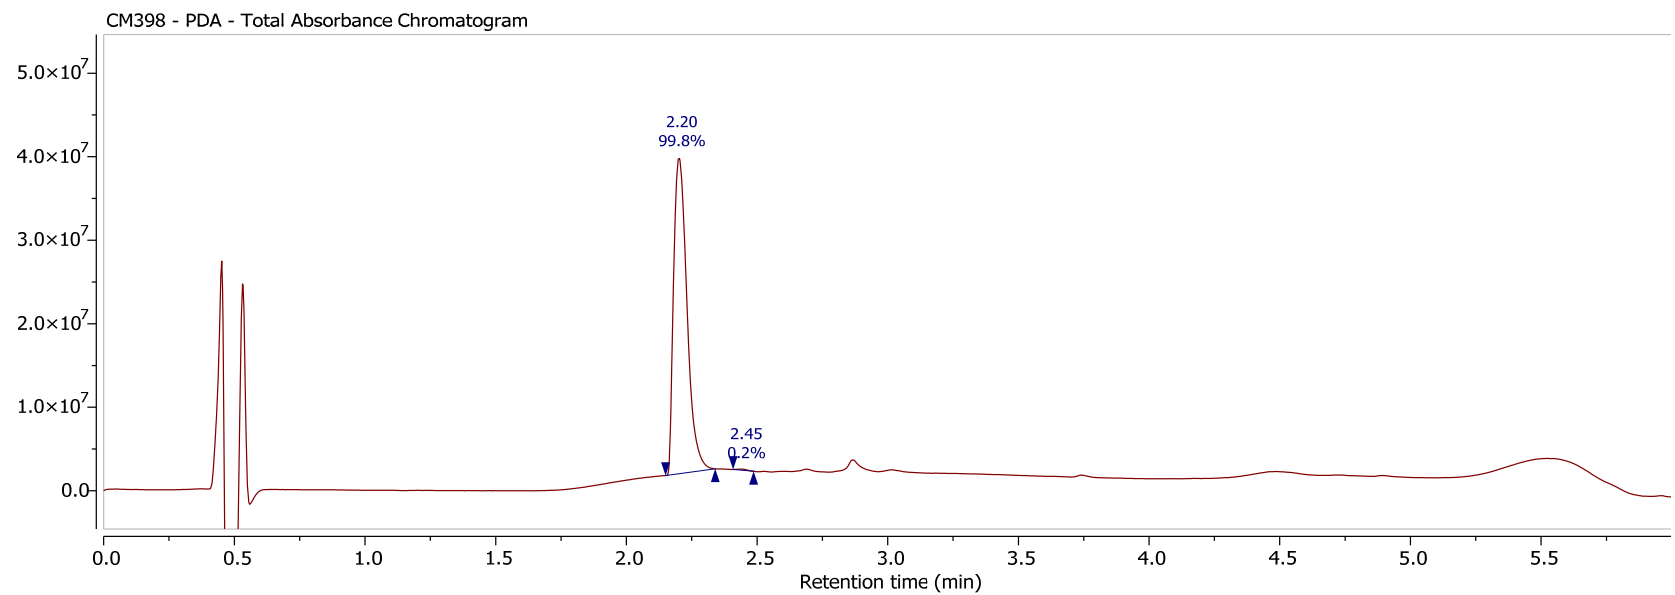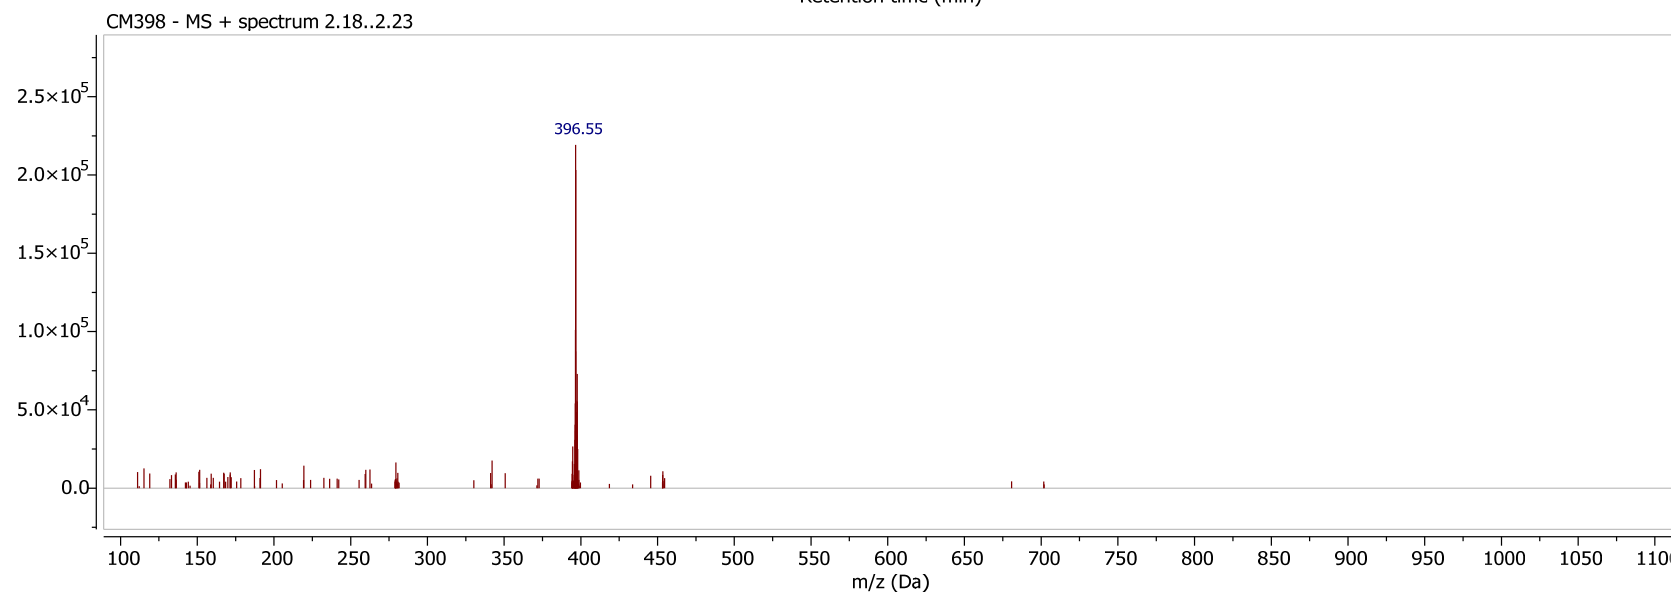

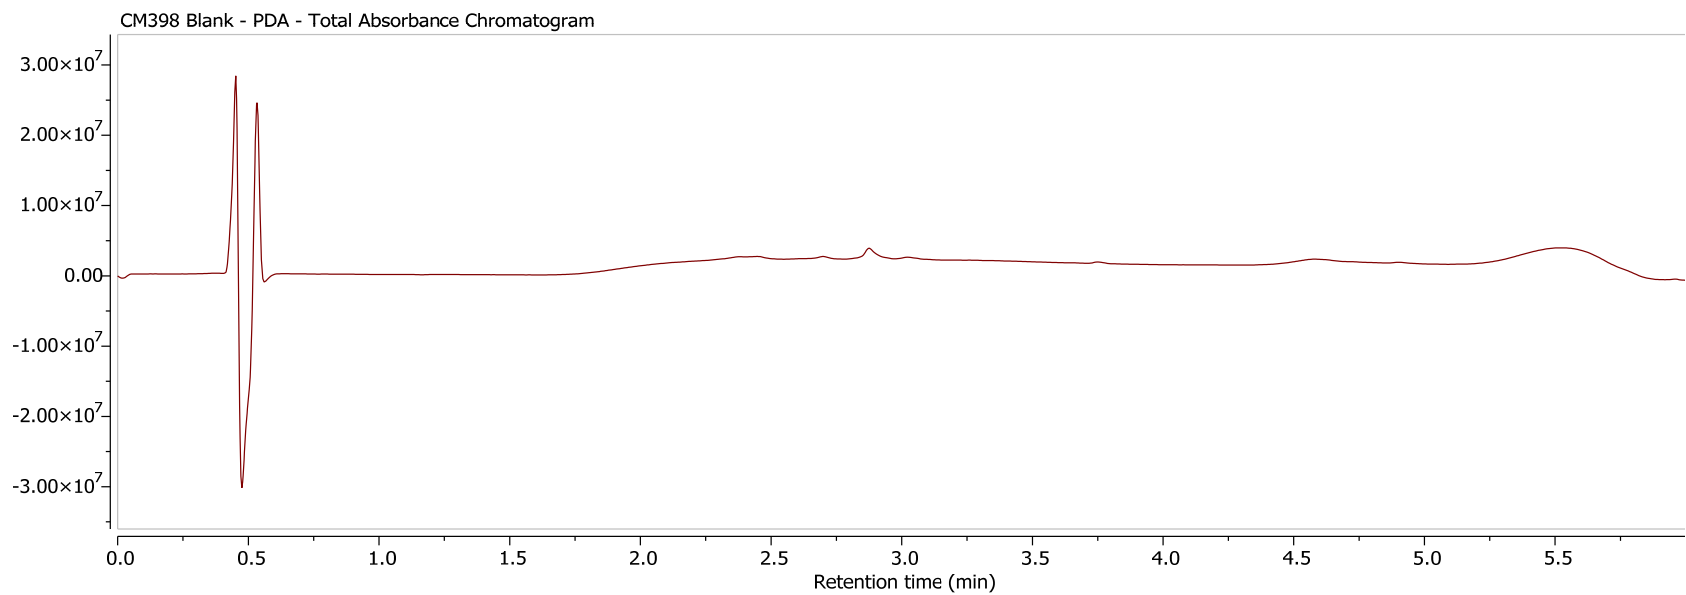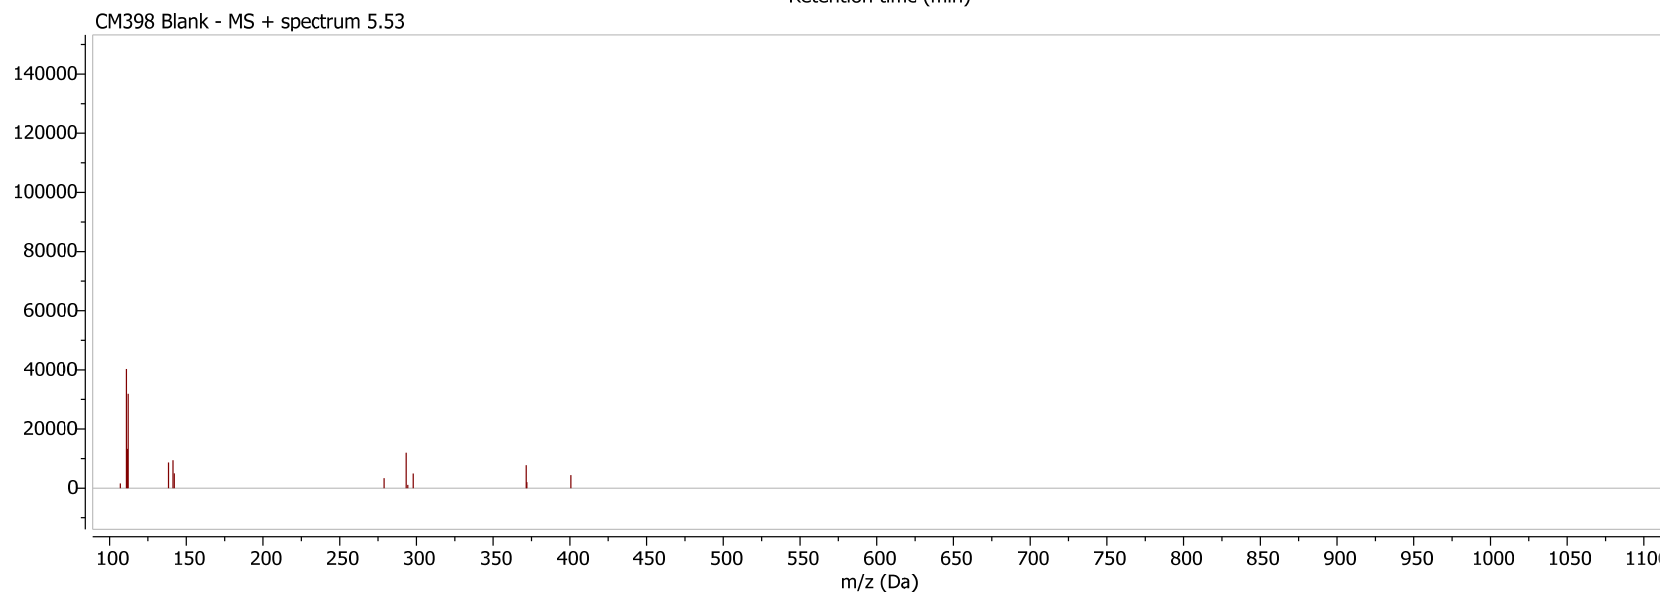

Supplement: s1 [file s1]
